# Supplementary material for: Iron derived from autophagy-mediated ferritin degradation induces cardiomyocyte death and heart failure in mice
Source: eLife. 2021 Feb 2;10:e62174. doi: 10.7554/eLife.62174 (PMC7853718; doi:10.7554/eLife.62174)
Supplement: Figure 1—figure supplement 1—source data 1. [file elife-62174-fig1-figsupp1-data1.xlsx]

## Sheet: Figure 1—figure supplement 1
	Figure 1—figure supplement 1—Source Data 1
	Figure 1—figure supplement 1—data table 1
	Fig. 1 sup 1C	NCOA4	Ncoa4+/+	Ncoa4–/–
			1	0.154616
			1	0.172577
			1	0.154616
			1	0.175475
	Fig. 1 sup 1D	Ncoa4/Gapdh	Ncoa4+/+	Ncoa4–/–
			1.15937	0.201151
			1.04561	0.209679
			0.983737	0.182222
			1.05517	0.196673
			1.07296	0.162202
			0.923748	0.178027
			0.793781	0.188206
			0.96563	0.171954
