# Supplementary material for: Iron derived from autophagy-mediated ferritin degradation induces cardiomyocyte death and heart failure in mice
Source: eLife. 2021 Feb 2;10:e62174. doi: 10.7554/eLife.62174 (PMC7853718; doi:10.7554/eLife.62174)
Supplement: Figure 1—figure supplement 2—source data 1. [file elife-62174-fig1-figsupp2-data1.xlsx]

## Sheet: Figure 1—figure supplement 2
	Figure 1—figure supplement 2—Source Data 1
	Figure 1—figure supplement 2—data table 1
	Fig. 1 sup 2	Nppa/Gapdh	Sham-Ncoa4+/+	TAC-Ncoa4+/+	Sham-Ncoa4–/–	TAC-Ncoa4–/–		Fig. 1 sup 2	Col1a2/Gapdh	Sham-Ncoa4+/+	TAC-Ncoa4+/+	Sham-Ncoa4–/–	TAC-Ncoa4–/–
			0.784054	39.0894	1.16452	10.2157				1.0783	9.67942	1.09659	4.59767
			0.977733	4.04868	0.612218	5.21988				1.47047	2.02078	1.08064	1.11517
			0.281318	21.0741	1.30957	2.16143				0.835661	3.11418	1.42385	1.16562
			1.01733	44.1982	1.34215	2.90091				0.91893	4.12197	0.942469	2.07507
			0.587893	14.1462	1.20384	3.0008				0.664731	2.05212	0.943878	1.3788
			0.985783	3.06077	1.65446	3.32457				0.877273	1.65786	1.08325	1.37473
			0.908532	8.79067	1.57264	3.33411				1.17355	3.60008	1.10502	1.71996
			2.45736	20.9656	0.579123	1.24755				0.981077	6.10063	1.08269	1.12285
	Fig. 1 sup 2	Nppb/Gapdh	Sham-Ncoa4+/+	TAC-Ncoa4+/+	Sham-Ncoa4–/–	TAC-Ncoa4–/–		Fig. 1 sup 2	Col3a1/Gapdh	Sham-Ncoa4+/+	TAC-Ncoa4+/+	Sham-Ncoa4–/–	TAC-Ncoa4–/–
			0.887519	4.58909	1.07081	3.09716				1.15641	7.83929	1.13895	5.0956
			1.03853	3.00141	1.55698	2.08486				1.02645	1.36662	1.05253	0.764569
			1.40079	2.54223	2.76824	1.39417				1.42888	3.26597	1.66944	0.957628
			1.06902	6.66823	1.69152	2.1974				0.862446	3.63777	1.04207	1.66974
			1.06875	2.1422	1.70228	3.76452				0.684133	2.5616	0.947815	1.71315
			0.637493	2.17338	1.55298	3.61503				0.746478	1.55229	1.5608	1.67609
			0.995653	6.90825	1.32871	2.8258				1.38557	3.6839	0.96959	1.94379
			0.902241	8.92939	1.79305	2.18153				0.709639	5.34139	1.64445	1.3947
	Fig. 1 sup 2	Myh7/Gapdh	Sham-Ncoa4+/+	TAC-Ncoa4+/+	Sham-Ncoa4–/–	TAC-Ncoa4–/–
			0.949749	20.7458	1.48342	4.06372
			1.95279	5.19952	0.775955	2.06426
			0.718122	3.83377	0.517085	2.76305
			0.766973	16.9107	0.823952	1.82936
			0.623527	9.17796	0.707549	2.91593
			1.22249	1.79345	0.499826	3.89421
			0.821747	5.12107	1.44717	4.38878
			0.944604	4.55613	0.57281	0.884319
