# Supplementary material for: Iron derived from autophagy-mediated ferritin degradation induces cardiomyocyte death and heart failure in mice
Source: eLife. 2021 Feb 2;10:e62174. doi: 10.7554/eLife.62174 (PMC7853718; doi:10.7554/eLife.62174)
Supplement: Figure 1—figure supplement 3—source data 1. [file elife-62174-fig1-figsupp3-data1.xlsx]

## Sheet: Figure 1—figure supplement 3
	Figure 1—figure supplement 3—Source Data 1
	Figure 1—figure supplement 3—data table 1
	Fig. 1 sup 3	LVIDd	Myh6-Cre–	Myh6-Cre+
			4.19	4.38
			3.85509	4.07917
			3.99769	3.98241
			4.01806	4.09954
	Fig. 1 sup 3	LVIDs	Myh6-Cre–	Myh6-Cre+
			3.09	3.19
			2.73982	2.98426
			2.96898	2.86713
			3.03518	3.07593
	Fig. 1 sup 3	FS	Myh6-Cre–	Myh6-Cre+
			26.2166	27.3524
			28.93	26.8415
			25.7325	28.0051
			24.4614	24.9689
