# Supplementary material for: Iron derived from autophagy-mediated ferritin degradation induces cardiomyocyte death and heart failure in mice
Source: eLife. 2021 Feb 2;10:e62174. doi: 10.7554/eLife.62174 (PMC7853718; doi:10.7554/eLife.62174)
Supplement: Figure 1—source data 1. [file elife-62174-fig1-data1.xlsx]

## Sheet: Figure 1
	Figure 1—Source Data 1
	Figure 1—data table 1
	Fig.1B	LVIDd	Sham-Ncoa4+/+	TAC-Ncoa4+/+	Sham-Ncoa4–/–	TAC-Ncoa4–/–		Fig.1B	IVSd	Sham-Ncoa4+/+	TAC-Ncoa4+/+	Sham-Ncoa4–/–	TAC-Ncoa4–/–		Fig.1C	LV/Tibia	Sham-Ncoa4+/+	TAC-Ncoa4+/+	Sham-Ncoa4–/–	TAC-Ncoa4–/–
			3.3713	3.69213	3.35093	3.54444				0.743519	0.972685	0.80463	0.926852				6.81111	6.36047	6.48864	8.05814
			3.10648	4.61389	3.34074	3.3				0.738426	1.08472	0.738426	0.916667				5.92683	10.2775	5.72093	5.88235
			3.20833	3.63102	3.31528	3.6412				0.728241	1.03889	0.738426	1.04907				5.97714	9.51163	5.57459	8.50286
			3.22361	4.42037	3.39167	3.0963				0.718056	1.0338	0.763889	1.12037				5.75581	11.5575	5.87845	8.28409
			3.41713	4.87361	3.11667	3.17778				0.753704	1.06435	0.753704	1.0287				6.54913	13.36	6.24	7.72093
			2.99444	4.24213	3.27454	3.24907				0.728241	1.06435	0.743519	1.03889				5.88372	10.883	5.87845	7.59887
			2.94352	3.89074	3.08611	3.26435				0.718056	0.98287	0.723148	0.998148				5.61176	9.4023	6.11765	7.77326
			2.99444	4.125	3.19306	2.89259				0.758796	0.921759	0.743519	1.08472				5.60112	8.16571	6.7069	7.88571
			3.07593	4.10972	3.4375	3.15741				0.763889	1.06435	0.728241	1.0287				5.6474	8.67241	6.41379	7.62712
			3.25926	4.14028	3.13704	3.30509				0.758796	1.07963	0.723148	0.952315				5.46821	11.0617	6.07647	5.93642
	Fig.1B	LVIDs	Sham-Ncoa4+/+	TAC-Ncoa4+/+	Sham-Ncoa4–/–	TAC-Ncoa4–/–		Fig.1B	LVPWd	Sham-Ncoa4+/+	TAC-Ncoa4+/+	Sham-Ncoa4–/–	TAC-Ncoa4–/–		Fig.1C	Lung/Tibia	Sham-Ncoa4+/+	TAC-Ncoa4+/+	Sham-Ncoa4–/–	TAC-Ncoa4–/–
			1.62963	2.60231	1.60417	1.98611				0.753704	1.14583	0.784259	0.926852				10.8556	8.72674	8.76705	9.22093
			1.54306	3.87546	1.64491	1.55324				0.702778	1.20185	0.763889	0.931944				9.47561	10.2717	9.25	8.08235
			1.56343	2.5412	1.66019	1.90972				0.733333	0.98287	0.753704	1.04907				9.62286	9.2907	8.26519	8.25143
			1.55324	4.00278	1.75185	1.81806				0.733333	1.21713	0.738426	1.1662				9.09302	24.454	9.37569	7.46591
			1.75694	4.34398	1.54306	1.76204				0.728241	1.07963	0.748611	1.03889				9.3237	29.1486	9.34857	9.14535
			1.50741	3.3662	1.63472	1.94537				0.763889	1.26806	0.733333	1.0287				9.01744	14.6725	8.11602	9.0791
			1.48704	2.69907	1.50232	1.66019				0.758796	0.9625	0.748611	1.03889				8.93529	11.5345	7.85882	8.63953
			1.46667	2.93333	1.61944	1.51759				0.774074	0.916667	0.743519	1.02361				8.71348	10.5543	10.2299	8.18857
			1.5125	2.98935	1.69583	1.76713				0.774074	1.12546	0.733333	1.07963				9.20809	8.83333	8.00575	8.28249
			1.51759	3.5088	1.54815	1.7162				0.758796	1.07963	0.758796	0.886111				8.64162	11.1358	8.10588	8.58382
	Fig.1B	FS	Sham-Ncoa4+/+	TAC-Ncoa4+/+	Sham-Ncoa4–/–	TAC-Ncoa4–/–		Fig.1B	LV mass	Sham-Ncoa4+/+	TAC-Ncoa4+/+	Sham-Ncoa4–/–	TAC-Ncoa4–/–		Fig.1D	Fibrotic fraction	Sham-Ncoa4+/+	TAC-Ncoa4+/+	Sham-Ncoa4–/–	TAC-Ncoa4–/–
			51.6616	29.5172	52.1277	43.9655				64.7298	121.954	69.5842	94.4271				0.823221	5.45611	0.385137	1.94633
			50.3278	16.0044	50.7622	52.9321				53.9099	192.255	64.0902	84.2521				0.873344	13.1667	0.281042	2.89689
			51.2698	30.014	49.9232	47.5525				57.8556	111.053	62.7224	117.728				0.931415	11.5939	1.40048	2.92243
			51.8167	9.44699	48.3483	41.2829				57.7387	175.77	65.6627	105.67				0.895659	2.7498	0.664971	1.52659
			48.5842	10.8673	50.4902	44.5513				65.2309	191.822	57.4022	93.9759				0.499671	2.47291	1.12766	1.60875
			49.6599	20.6483	50.0778	40.1254				53.4	173.524	60.6325	97.1013
			49.481	30.6283	51.3201	49.142				51.2431	116.981	54.9243	95.622		Fig.1D	Cardiomyocyte area	Sham-Ncoa4+/+	TAC-Ncoa4+/+	Sham-Ncoa4–/–	TAC-Ncoa4–/–
			51.0204	28.8889	49.2823	47.5352				55.4655	118.648	58.8019	84.5212				259.431	679.216	271.993	374.411
			50.8278	27.2615	50.6667	44.0322				58.1062	150.842	64.6336	95.8904				240.467	588.774	283.384	373.564
			53.4375	15.2522	50.6494	48.074				62.4819	149.544	56.905	83.7769				278.585	549.428	293.57	361.175
																	253.066	501.042	309.919	420.924
																	241.029	750.532	223.732	462.162
