# Supplementary material for: Iron derived from autophagy-mediated ferritin degradation induces cardiomyocyte death and heart failure in mice
Source: eLife. 2021 Feb 2;10:e62174. doi: 10.7554/eLife.62174 (PMC7853718; doi:10.7554/eLife.62174)
Supplement: Figure 1—source data 3. [file elife-62174-fig1-data3.xlsx]

## Sheet: Figure 1—source data 2
	Figure 1—Source Data 3
	Fig. 1 source data 2	Body weight (g)	Ncoa4+/+	Ncoa4–/–		Fig. 1 source data 2	Heart weight/TL (mg/mm)	Ncoa4+/+	Ncoa4–/–		Fig. 1 source data 2	LVIDs (mm)	Ncoa4+/+	Ncoa4–/–
			25.6	27				7.41765	8.77193				1.53287	1.54306
			23.7	26.5				8.06587	8.75				1.54815	1.57361
			26.4	25.8				6.71176	7.9883				1.45139	1.54306
			26.4	25.2				8.83626	8.33129				1.50232	1.53796
			23.5	25.6				7.88344	8.51515				1.64491	1.47685
			25.9	24.1				7.86145	7.35583				1.46157	1.46157
			28.3	24.9				9.49419	7.75449				1.5787	1.56852
			25.6	26.8				9.34146	7.97059				1.65	1.43102
	Fig. 1 source data 2	Tibia length (mm)	Ncoa4+/+	Ncoa4–/–		Fig. 1 source data 2	LV weight/TL (mg/mm)	Ncoa4+/+	Ncoa4–/–		Fig. 1 source data 2	IVSd (mm)	Ncoa4+/+	Ncoa4–/–
			17	17.1				5.02353	6.29825				0.723148	0.758796
			16.7	17.6				5.43114	6.13636				0.728241	0.753704
			17	17.1				4.82941	5.87135				0.758796	0.748611
			17.1	16.3				5.98246	5.72393				0.733333	0.728241
			16.3	16.5				5.35583	5.96364				0.733333	0.743519
			16.6	16.3				5.39157	5.11656				0.712963	0.738426
			17.2	16.7				6.73256	5.49102				0.743519	0.763889
			16.4	17				6.95732	5.75882				0.748611	0.758796
	Fig. 1 source data 2	Systolic BP (mmHg)	Ncoa4+/+	Ncoa4–/–		Fig. 1 source data 2	Lung weight/TL (mg/mm)	Ncoa4+/+	Ncoa4–/–		Fig. 1 source data 2	LVPWd (mm)	Ncoa4+/+	Ncoa4–/–
			112	101				8.06471	9.60819				0.718056	0.718056
			100	100				9.0479	9.01705				0.723148	0.728241
			102	103				8.22353	8.9883				0.728241	0.738426
			102	98				9.84211	8.64417				0.728241	0.743519
			97	110				8.36196	10.2727				0.702778	0.728241
			105	105				9.25904	8.80982				0.733333	0.733333
			103	97				9.33721	8.52096				0.753704	0.738426
			101	84				9.40244	8.65294				0.723148	0.743519
	Fig. 1 source data 2	Heart rate (bpm)	Ncoa4+/+	Ncoa4–/–		Fig. 1 source data 2	LVIDd (mm)	Ncoa4+/+	Ncoa4–/–		Fig. 1 source data 2	FS (%)	Ncoa4+/+	Ncoa4–/–
			704.161	702.439				3.07083	3.26435				50.0829	52.7301
			702.439	722.027				3.06574	3.18796				49.5017	50.639
			707.621	709.428				3.05556	3.10648				52.5	50.3278
			705.882	705.899				3.0912	3.025				51.4003	49.1582
			707.621	712.941				3.26944	2.96898				49.6885	50.2573
			716.578	711.22				3.04028	3.06065				51.9263	52.2463
			714.68	714.68				3.17778	3.14213				50.3205	50.081
			714.645	716.418				3.29491	2.8875				49.9227	50.4409
