# Supplementary material for: Iron derived from autophagy-mediated ferritin degradation induces cardiomyocyte death and heart failure in mice
Source: eLife. 2021 Feb 2;10:e62174. doi: 10.7554/eLife.62174 (PMC7853718; doi:10.7554/eLife.62174)
Supplement: Figure 2—figure supplement 1—source data 1. [file elife-62174-fig2-figsupp1-data1.xlsx]

## Sheet: Figure 2—figure supplement 1
	Figure 2—figure supplement 1—Source Data 1
	Figure 2—figure supplement 1—data table 1
	Fig. 2 sup 1		Sham-Ncoa4+/+	TAC-Ncoa4+/+	Sham-Ncoa4–/–	TAC-Ncoa4–/–
		FS pre	49.1639	50.0768	50	48.949
			50	51.2158	51.3932	51.8633
			51.505	49.4983	50	50.7553
		FS Day3	49.2891	46.4978	49.2187	45.4412
			49.9208	47.0588	50.7317	46.8998
			49.6656	46.9188	50	46.2349
		FS Day5	51.0949	32.7078	49.4574	50.8448
			51.3219	29.5039	48.8735	50.0783
			51.2156	27.0161	50.6667	47.4212
		FS Day7	51.8272	35.8273	49.4453	48.0362
			48.5904	31.0038	51.0938	49.6774
			51.4516	24.1107	51.8127	48.8827
	Fig. 2 sup 1		Sham-Ncoa4+/+	TAC-Ncoa4+/+	Sham-Ncoa4–/–	TAC-Ncoa4–/–
		LVIDd pre	3.04537	3.14722	3.23889	3.39167
			3.19815	3.35093	3.28981	3.27963
			3.04537	3.04537	3.19815	3.3713
		LVIDd Day3	3.22361	3.41713	3.25926	3.46296
			3.21343	3.46296	3.13194	3.20324
			3.04537	3.63611	3.28981	3.38148
		LVIDd Day5	3.48843	3.79907	3.28472	3.31528
			3.27454	3.90093	2.93843	3.25417
			3.14213	3.78889	3.05556	3.55463
		LVIDd Day7	3.06574	3.94155	3.21343	3.3713
			3.07083	4.00787	3.25926	3.15741
			3.15741	3.86528	3.3713	3.6463
	Fig. 2 sup 1		Sham-Ncoa4+/+	TAC-Ncoa4+/+	Sham-Ncoa4–/–	TAC-Ncoa4–/–
		LVIDs pre	1.54815	1.57361	1.61944	1.73148
			1.59907	1.63472	1.59907	1.5787
			1.47685	1.53796	1.59907	1.66019
		LVIDs Day3	1.63472	1.82824	1.65509	1.88935
			1.60926	1.83333	1.54306	1.70093
			1.53287	1.93009	1.64491	1.81806
		LVIDs Day5	1.70602	2.55648	1.66019	1.62963
			1.59398	2.75	1.50232	1.62454
			1.53287	2.76528	1.50741	1.86898
		LVIDs Day7	1.47685	2.5294	1.62454	1.75185
			1.5787	2.76528	1.59398	1.58889
			1.53287	2.93333	1.62454	1.86389
