# Supplementary material for: Iron derived from autophagy-mediated ferritin degradation induces cardiomyocyte death and heart failure in mice
Source: eLife. 2021 Feb 2;10:e62174. doi: 10.7554/eLife.62174 (PMC7853718; doi:10.7554/eLife.62174)
Supplement: Figure 2—source data 1. [file elife-62174-fig2-data1.xlsx]

## Sheet: Figure 2
	Figure 2—Source Data 1
	Figure 2—data table 1
	Fig. 2A	FTH1/GAPDH	Sham-Ncoa4+/+	TAC-Ncoa4+/+	Sham-Ncoa4–/–	TAC-Ncoa4–/–			Fig. 2F	LC3B-FTH1	Sham	3 days	5 days	7 days	4 w
			0.860309	0.57193	1.67404	1.13181					0.2914	0.238419	1.82788	2.78155	0.794729
			1.13641	0.409845	2.27745	1.53582					0.450346	0.450346	1.7484	2.72857	0.900692
			0.807048	0.527588	2.17877	0.682873					0.397364	0.423855	1.80139	2.59611	1.11262
			0.966795	0.29332	2.30718	1.24501					0.476837	0.662274	2.11928	2.72857	1.05964
			1.24048	0.332681	1.70181	1.64063					0.529819	0.582801	1.80139	2.3577	1.03315
			0.98896	0.437033	1.6363	1.67521
	Fig. 2B	Fth1/Gapdh	Sham-Ncoa4+/+	TAC-Ncoa4+/+	Sham-Ncoa4–/–	TAC-Ncoa4–/–			Fig. 2H	LAMP2a-FTH1	Sham	3 days	5 days	7 days	4 w
			1.03662	0.614688	1.27845	0.938289					1.64244	1.93384	2.3577	4.00013	2.96699
			1.1669	0.770122	1.13458	0.6462					2.01331	2.3577	3.07295	4.07961	1.72191
			1.04082	0.492485	0.830024	1.21381					1.80138	1.96033	2.75506	3.07295	2.43717
			0.989112	0.471908	1.12623	0.828373					1.40402	2.67559	2.72857	4.82135	2.78155
			0.84994	0.597299	1.02025	0.833506					1.35104	1.00666	2.17226	2.43717	1.48349
			0.860191	1.06109	1.14446	0.931905
			1.08149	1.17092	1.24601	0.885697
			0.974926	0.408286	0.927241	0.594229
	Fig. 2C	FTH1/GAPDH	Sham	3 days	5 days	7 days	4 w
			0.783369	1.4009	0.303842	0.18875	0.446358
			0.9657	1.25449	0.514147	0.410397	0.456694
			1.03178	1.14296	0.747895	0.319824	0.416995
			1.19613	1.40915	0.565922	0.813622	0.313615
			1.02302	1.00811	0.333498	0.237735	0.210609
	Fig. 2D	Fth1/Gapdh	Sham	3 days	5 days	7 days	4 w
			0.926866	1.51825	2.00825	1.45105	0.546667
			0.936602	0.964764	1.90482	1.56892	0.646029
			0.915089	0.91342	1.59408	1.79264	0.418637
			1.10818	0.823221	1.39265	1.78766	0.413657
			1.11326	0.954105	1.81881	1.63857	0.552182
