# Supplementary material for: Iron derived from autophagy-mediated ferritin degradation induces cardiomyocyte death and heart failure in mice
Source: eLife. 2021 Feb 2;10:e62174. doi: 10.7554/eLife.62174 (PMC7853718; doi:10.7554/eLife.62174)
Supplement: Figure 3—source data 1. [file elife-62174-fig3-data1.xlsx]

## Sheet: Figure 3
	Figure 3—Source Data 1
	Figure 3—data table 1
	Fig. 3A	FTH1/GAPDH	Sham-Ncoa4+/+	TAC-Ncoa4+/+	Sham-Ncoa4–/–	TAC-Ncoa4–/–
			1.02315	0.283269	1.81074	1.2659
			0.840762	0.664961	1.3579	1.59507
			0.874298	0.673084	1.1379	1.4277
			0.965916	0.721489	1.18624	1.02038
			1.29587	0.369544	1.14045	1.35367
	Fig. 3B	Fth1/Gapdh	Sham-Ncoa4+/+	TAC-Ncoa4+/+	Sham-Ncoa4–/–	TAC-Ncoa4–/–
			0.956034	1.43593	1.03353	1.14756
			0.988868	1.5646	1.09149	0.926903
			0.928689	1.6979	1.11423	1.14432
			1.03308	1.75203	0.890828	1.02626
			1.09333	1.60024	0.991841	1.02217
	Fig. 3D	LC3B-FTH1	Sham-Ncoa4+/+	TAC-Ncoa4+/+	Sham-Ncoa4–/–	TAC-Ncoa4–/–
			0.344382	2.78155	0.450346	0.317891
			0.450346	2.72857	0.2914	0.423855
			0.476837	2.59611	0.211928	0.370873
			0.2914	2.72857	0.423855	0.185437
			0.609292	2.3577	0.317891	0.185437
	Fig. 3F	LAMP2a-FTH1	Sham-Ncoa4+/+	TAC-Ncoa4+/+	Sham-Ncoa4–/–	TAC-Ncoa4–/–
			2.06629	4.00013	1.85437	1.96033
			2.56962	4.07961	1.96033	1.77489
			2.09279	3.07295	1.88086	1.77489
			1.72191	4.82135	1.1656	1.77489
			1.58946	2.43717	2.06629	1.56297
