# Supplementary material for: Iron derived from autophagy-mediated ferritin degradation induces cardiomyocyte death and heart failure in mice
Source: eLife. 2021 Feb 2;10:e62174. doi: 10.7554/eLife.62174 (PMC7853718; doi:10.7554/eLife.62174)
Supplement: Figure 4—figure supplement 1—source data 1. [file elife-62174-fig4-figsupp1-data1.xlsx]

## Sheet: Figure 4—figure supplement 1
	Figure 4—figure supplement 2—Source Data 1
	Figure 4—figure supplement 1—data table 1
	Fig. 4 sup 1A	Total non-heme iron	Sham-Ncoa4+/+	TAC-Ncoa4+/+	Sham-Ncoa4–/–	TAC-Ncoa4–/–
			111.605	103.539	119.553	112.792
			113.741	101.878	122.519	109.47
			114.215	105.911	116.113	111.605
			128.094	93.6928	118.248	112.448
			127.976	107.809	115.52	112.483
			114.69	103.895	120.858	100.217
	Fig. 4 sup 1B	IL-6	Sham-Ncoa4+/+	TAC-Ncoa4+/+	Sham-Ncoa4–/–	TAC-Ncoa4–/–
			103.985	217.764	89.2199	159.137
			82.7058	191.273	90.9569	166.303
			106.591	223.626	108.979	160.006
			83.3572	198.439	85.3114	159.789
			92.4769	221.238	119.619	167.171
			89.6541	188.885	103.551	133.515
			89.6541	220.261	89.437	128.087
			79.6659	190.188	94.8654	169.343
