# Supplementary material for: Iron derived from autophagy-mediated ferritin degradation induces cardiomyocyte death and heart failure in mice
Source: eLife. 2021 Feb 2;10:e62174. doi: 10.7554/eLife.62174 (PMC7853718; doi:10.7554/eLife.62174)
Supplement: Figure 4—figure supplement 2—source data 1. [file elife-62174-fig4-figsupp2-data1.xlsx]

## Sheet: Figure 4—figure supplement 2
	Figure 4—figure supplement 2—Source Data 1
	Figure 4—figure supplement 2—data table 1
	Fig. 4 sup 2A	IREB2/GAPDH	Sham-Ncoa4+/+	TAC-Ncoa4+/+	Sham-Ncoa4–/–	TAC-Ncoa4–/–		Fig. 4 sup 2B	Slc11a2/Gapdh	Sham-Ncoa4+/+	TAC-Ncoa4+/+	Sham-Ncoa4–/–	TAC-Ncoa4–/–
			0.798825	0.493888	1.58153	1.21769				1.03847	0.877536	0.889984	0.978895
			1.17671	0.592597	1.09472	1.66734				0.975777	0.800031	0.93837	0.772557
			0.847037	0.931358	1.65631	0.975506				0.761937	0.815827	0.790866	0.666855
			0.970785	1.09685	1.1145	0.846868				0.917895	0.84434	0.790864	0.844603
			1.38774	0.745739	1.14717	0.74981				0.954011	0.824308	0.748144	0.670412
			0.818897	0.650477	1.17558	0.84056				0.918215	0.877304	0.648201	0.569569
										1.19958	0.771679	0.757732	0.725456
	Fig. 4 sup 2A	SLC40A1/GAPDH	Sham-Ncoa4+/+	TAC-Ncoa4+/+	Sham-Ncoa4–/–	TAC-Ncoa4–/–				1.23412	1.07134	0.716157	0.933534
			0.775782	2.08629	0.820581	1.43875
			0.871257	0.519712	0.799992	0.618356		Fig. 4 sup 2B	Cdc14a/Gapdh	Sham-Ncoa4+/+	TAC-Ncoa4+/+	Sham-Ncoa4–/–	TAC-Ncoa4–/–
			0.855389	0.884847	0.628637	1.24034				1.08113	0.907546	1.10921	0.937452
			1.74453	2.71586	0.924599	1.59198				0.971598	0.8459	1.22266	0.951955
			0.547438	2.42039	1.64942	0.98244				0.808283	0.702596	1.20092	0.565272
			1.20561	1.39948	1.1043	1.02662				0.795238	0.593319	0.937033	0.452679
										0.982913	1.28008	0.785433	0.53451
	Fig. 4 sup 2A	TFRC/GAPDH	Sham-Ncoa4+/+	TAC-Ncoa4+/+	Sham-Ncoa4–/–	TAC-Ncoa4–/–				0.773595	1.12355	0.931558	0.297511
			0.601939	0.788195	0.990011	1.34272				1.0718	0.99432	0.984451	0.888983
			0.678467	1.13526	1.01804	1.42054				1.51544	0.763393	0.970583	0.634211
			0.436027	1.04487	0.650478	1.94579
			1.84779	1.35548	1.12396	2.84919		Fig. 4 sup 2B	Cdc42bpa/Gapdh	Sham-Ncoa4+/+	TAC-Ncoa4+/+	Sham-Ncoa4–/–	TAC-Ncoa4–/–
			1.1509	2.61243	1.3354	1.31782				1.1729	0.916613	0.960437	1.25528
			1.28488	2.42896	1.45039	2.22637				1.13907	0.983588	0.909442	0.865904
										1.08661	0.717166	0.974277	0.827432
	Fig. 4 sup 2B	Tfrc/Gapdh	Sham-Ncoa4+/+	TAC-Ncoa4+/+	Sham-Ncoa4–/–	TAC-Ncoa4–/–				0.852562	0.66338	1.06091	0.850378
			0.756389	0.447685	1.10718	1.13094				0.79552	1.09331	0.735895	0.792518
			0.564218	0.302736	1.48594	1.34205				0.812955	0.978395	0.683625	0.753907
			0.462221	1.38151	1.06774	0.720754				1.09007	0.669058	0.744908	0.706394
			1.43781	1.20922	0.872088	1.27207				1.05032	0.802488	0.790442	0.765868
			1.32459	0.414533	0.995316	0.865695
			1.09153	1.13645	1.03052	0.352097		Fig. 4 sup 2C	IRE binding activity	Sham-Ncoa4+/+	TAC-Ncoa4+/+	Sham-Ncoa4–/–	TAC-Ncoa4–/–
			1.842	1.7175	1.74173	2.48333				98.7012	104.83	101.379	99.5307
			0.521244	1.47451	1.35988	1.26191				99.626	98.9882	102.523	102.59
										101.673	101.479	100.124	99.6818
