# Supplementary material for: Iron derived from autophagy-mediated ferritin degradation induces cardiomyocyte death and heart failure in mice
Source: eLife. 2021 Feb 2;10:e62174. doi: 10.7554/eLife.62174 (PMC7853718; doi:10.7554/eLife.62174)
Supplement: Figure 4—figure supplement 3—source data 1. [file elife-62174-fig4-figsupp3-data1.xlsx]

## Sheet: Figure 4—figure supplement 3
	Figure 4—figure supplement 3—Source Data 1
	Figure 4—figure supplement 3—data table 1
	Fig. 4 sup 3A	4-HNE	Sham-Ncoa4+/+	TAC-Ncoa4+/+	Sham-Ncoa4–/–	TAC-Ncoa4–/–
			2.10054	26.7262	1.63072	4.70399
			3.72284	17.9451	2.32443	3.4166
			3.46576	6.47673	1.86384	2.48142
			1.67273	26.8038	2.01961	1.75371
			1.91471	4.46727	1.72537	3.21803
	Fig. 4 sup 3B	SOD2/GAPDH	Sham-Ncoa4+/+	TAC-Ncoa4+/+	Sham-Ncoa4–/–	TAC-Ncoa4–/–
			1.13326	0.926107	1.02673	1.01217
			0.97317	0.764844	1.11721	1.03781
			1.04564	0.920888	0.967729	1.02244
			0.766053	1.08507	0.76309	0.864731
			0.927458	0.932146	0.648411	0.94823
			1.15442	0.515783	0.798454	1.07823
	Fig. 4 sup 3B	HO-1/GAPDH	Sham-Ncoa4+/+	TAC-Ncoa4+/+	Sham-Ncoa4–/–	TAC-Ncoa4–/–
			0.977954	0.77537	0.835518	0.917532
			0.739768	0.601323	0.73971	0.676291
			0.745078	0.628479	0.848391	0.660953
			1.26587	0.920148	0.943847	1.26162
			1.11373	0.836498	0.930449	1.16877
			1.15761	0.898206	1.66396	1.17764
