# Supplementary material for: Iron derived from autophagy-mediated ferritin degradation induces cardiomyocyte death and heart failure in mice
Source: eLife. 2021 Feb 2;10:e62174. doi: 10.7554/eLife.62174 (PMC7853718; doi:10.7554/eLife.62174)
Supplement: Figure 4—figure supplement 4—source data 1. [file elife-62174-fig4-figsupp4-data1.xlsx]

## Sheet: Figure 4—figure supplement 4
	Figure 4—figure supplement 4—Source Data 1
	Figure 4—figure supplement 4—data table 1
	Fig. 4 sup 4A	Slc7a11/Gapdh	Sham-Ncoa4+/+	TAC-Ncoa4+/+	Sham-Ncoa4–/–	TAC-Ncoa4–/–		Fig. 4 sup 4D	Slc38a1/Gapdh	Sham-Ncoa4+/+	TAC-Ncoa4+/+	Sham-Ncoa4–/–	TAC-Ncoa4–/–		Fig. 4 sup 4D	Gls1/Gapdh	Sham-Ncoa4+/+	TAC-Ncoa4+/+	Sham-Ncoa4–/–	TAC-Ncoa4–/–
			1.97854	1.13353	2.11956	3.15052				0.653736	0.892488	0.48253	0.748066				1.04605	0.83651	0.86694	0.907695
			0.414897	0.843485	0.475272	0.9587				1.12259	0.572492	0.377989	0.484981				1.17808	0.741809	0.812149	0.675382
			1.38156	2.06426	0.126409	0.94149				0.455777	0.640607	0.368984	0.539412				0.840941	0.642233	0.614496	0.818603
			0.607081	2.49178	0.436396	0.263379				1.23216	0.731983	0.20402	0.700932				1.00977	0.485201	0.674058	0.66568
			0.391455	3.74362	0.678489	0.616705				0.931644	0.8898	0.399057	0.423476				0.699637	0.662593	0.697685	0.649774
			1.71142	0.377374	0.459847	1.72805				0.947374	0.800919	0.343429	0.344741				1.12038	1.01499	0.669307	0.510351
			1.025	1.03284	0.651059	0.334578				1.19567	1.18347	0.689386	0.464479				1.04409	0.847132	0.947975	0.704726
			0.490042	3.12241	0.311417	1.80786				1.46105	0.974993	0.348153	0.766697				1.06105	0.585754	0.712201	0.642086
	Fig. 4 sup 4B	Cystine	Sham-Ncoa4+/+	TAC-Ncoa4+/+	Sham-Ncoa4–/–	TAC-Ncoa4–/–		Fig. 4 sup 4D	Slc1a5/Gapdh	Sham-Ncoa4+/+	TAC-Ncoa4+/+	Sham-Ncoa4–/–	TAC-Ncoa4–/–		Fig. 4 sup 4D	Gls2/Gapdh	Sham-Ncoa4+/+	TAC-Ncoa4+/+	Sham-Ncoa4–/–	TAC-Ncoa4–/–
				0.06	0.17	0.09				1.20915	1.796	1.00363	1.14886				0.809262	0.632842	1.01534	0.657829
			0.01	0.07	0.14	0.07				1.46897	1.03596	0.74377	0.839297				0.773378	0.634433	0.959145	0.751623
			0.06	0.07	0.1	0.08				0.582733	1.03696	0.561184	1.21083				0.68926	0.463607	1.03245	1.354
			0.09	0.05	0.09	0.1				1.02161	0.894607	0.448003	0.684124				0.542389	0.691329	0.55789	0.774194
			0.06	0.1	0.08	0.08				0.741123	1.09064	0.772136	0.7606				0.743727	1.33475	1.67623	1.2188
										0.872839	1.074	0.739377	0.789789				0.980208	1.66806	0.668293	0.34813
										0.961623	0.83893	1.14454	0.816439				1.90335	0.401895	0.538016	0.326087
										1.14196	0.863068	0.519685	0.558167				1.55842	0.657943	1.01705	0.781304
	Fig. 4 sup 4C	Glutamate	Sham-Ncoa4+/+	TAC-Ncoa4+/+	Sham-Ncoa4–/–	TAC-Ncoa4–/–		Fig. 4 sup 4D	Slc7a5/Gapdh	Sham-Ncoa4+/+	TAC-Ncoa4+/+	Sham-Ncoa4–/–	TAC-Ncoa4–/–
			272.94	140.209	297.049	319.344				0.841866	1.24961	0.732087	1.35729
			275.532	133.728	279.68	287.457				1.33119	1.02699	0.697588	0.824581
			272.162	118.173	325.565	242.608				0.833056	0.912211	0.537365	1.05539
			276.05	133.468	312.085	229.646				1.08937	1.04238	0.353022	0.806892
			310.011	124.136	286.161	282.272				0.83657	0.861534	0.593252	0.951635
										0.916438	0.95384	0.716726	1.18881
										1.00862	1.20017	0.904424	0.830569
										1.14289	1.3067	0.624523	0.693354
