# Supplementary material for: Iron derived from autophagy-mediated ferritin degradation induces cardiomyocyte death and heart failure in mice
Source: eLife. 2021 Feb 2;10:e62174. doi: 10.7554/eLife.62174 (PMC7853718; doi:10.7554/eLife.62174)
Supplement: Figure 4—source data 1. [file elife-62174-fig4-data1.xlsx]

## Sheet: Figure 4
	Figure 4—Source Data 1
	Figure 4—data table 1
	Fig. 4A	Total non-haem iron	Sham-Ncoa4+/+	TAC-Ncoa4+/+	Sham-Ncoa4–/–	TAC-Ncoa4–/–		Fig. 4C	Ptgs2/Gapdh	Sham-Ncoa4+/+	TAC-Ncoa4+/+	Sham-Ncoa4–/–	TAC-Ncoa4–/–		Fig. 4F	GSH	Sham-Ncoa4+/+	TAC-Ncoa4+/+	Sham-Ncoa4–/–	TAC-Ncoa4–/–
			67.3027	65.8961	78.9221	62.1657				1.31585	4.69117	2.13842	3.25835				38.5408	38.4457	32.6357	41.5804
			78.0048	66.8746	71.4612	54.5213				0.811448	5.13417	0.850161	2.14879				41.9353	33.1769	40.6426	35.2093
			81.5517	65.04	72.4397	56.6617				0.364276	3.50651	2.07641	2.56555				45.1034	31.4279	39.6149	31.3515
			68.4646	66.2631	78.5551	55.0717				1.46292	5.28621	0.82109	1.6145				41.3858	34.8619	39.4226	37.9987
			83.0806	69.9323	73.8462	67.4861				0.631686	1.76786	0.715575	2.2895				47.0725	37.0023	44.9156	39.7665
			75.8032	59.4137	72.0727	57.3956				1.03393	3.19709	0.900578	2.74686
										1.10137	3.29669	0.741927	1.20391		Fig. 4F	GSSG	Sham-Ncoa4+/+	TAC-Ncoa4+/+	Sham-Ncoa4–/–	TAC-Ncoa4–/–
	Fig. 4A	Fe2+	Sham-Ncoa4+/+	TAC-Ncoa4+/+	Sham-Ncoa4–/–	TAC-Ncoa4–/–				1.27852	2.37238	0.853696	1.25063				0.870269	1.7275	1.11672	1.0657
			55.37	56.1271	65.5899	49.2597											0.964683	1.20104	1.06845	0.83354
			64.2922	55.5322	59.1011	43.0953		Fig. 4D	Serum TnT	Sham-Ncoa4+/+	TAC-Ncoa4+/+	Sham-Ncoa4–/–	TAC-Ncoa4–/–				1.01002	1.92778	0.842589	1.23583
			64.2922	54.9915	59.5878	42.9331				25.481	69.9037	12.0494	51.3251				0.788164	1.5204	0.805655	1.03326
			56.2893	55.2078	66.1847	43.2035				0	107.26	17.0567	69.0102				0.898074	1.85334	0.994713	1.071
			69.8077	58.8848	56.2352	53.2071				22.0995	95.2653	2.14343	46.0894
			63.3188	50.2871	60.1285	43.3116				1.32456	59.2395	0.506715	50.4502		Fig. 4F	GSH/GSSG	Sham-Ncoa4+/+	TAC-Ncoa4+/+	Sham-Ncoa4–/–	TAC-Ncoa4–/–
										4.6062	61.0081	0	42.6172				44.2861	22.2551	29.2246	39.0171
	Fig. 4A	Fe3+	Sham-Ncoa4+/+	TAC-Ncoa4+/+	Sham-Ncoa4–/–	TAC-Ncoa4–/–				0	133.544	0	54.8336				43.4706	27.6234	38.039	42.2408
			11.9327	9.76905	13.3321	12.906				0	171.125	0	48.7031				44.6559	16.3026	47.0157	25.3688
			13.7126	11.3423	12.3601	11.426				9.55926	154.609	8.73122	46.9597				52.5092	22.9294	48.9324	36.7757
			17.2596	10.0484	12.8519	13.7286											52.4149	19.9652	45.1544	37.1302
			12.1753	11.0552	12.3704	11.8682		Fig. 4E	GPX4/GAPDH	Sham-Ncoa4+/+	TAC-Ncoa4+/+	Sham-Ncoa4–/–	TAC-Ncoa4–/–
			13.2729	11.0475	17.611	14.279				1.14733	2.01697	0.705419	1.2967		Fig. 4G	Glutamine	Sham-Ncoa4+/+	TAC-Ncoa4+/+	Sham-Ncoa4–/–	TAC-Ncoa4–/–
			12.4843	9.1266	11.9442	14.084				1.25313	1.9706	1.19176	1.02126				319.635	239.726	273.973	308.219
										0.610245	1.4244	1.14488	0.638926				281.863	239.726	285.714	281.863
	Fig. 4A	Fe2+/FTH1	Sham-Ncoa4+/+	TAC-Ncoa4+/+	Sham-Ncoa4–/–	TAC-Ncoa4–/–				0.912087	4.34171	1.02509	1.94945				260.03	220.588	313.433	269.317
			64.3606	114.682	33.528	43.5229				0.960852	3.25082	1.39285	1.45444				334.324	208.333	335.821	309.524
			56.5749	144.203	24.3835	28.0602				1.11636	2.9981	1.69837	1.76503				278.603	222.883	338.308	309.524
			79.6634	112.944	25.2398	62.8713
			58.2226	225.64	23.9287	34.7013		Fig. 4F	Total glutathione	Sham-Ncoa4+/+	TAC-Ncoa4+/+	Sham-Ncoa4–/–	TAC-Ncoa4–/–
			56.2747	169.036	34.6012	32.4308				40.2814	41.9007	34.8691	43.7118
			64.0257	137.583	30.7322	25.8544				43.8647	35.579	42.7795	36.8764
										47.1234	35.2835	41.3001	33.8232
	Fig. 4B	MDA	Sham-Ncoa4+/+	TAC-Ncoa4+/+	Sham-Ncoa4–/–	TAC-Ncoa4–/–				42.9971	36.9284	39.4226	37.9987
			0.741903	1.02797	0.74973	0.764199				49.0619	39.1443	44.9156	39.7665
			0.643038	0.867393	0.678329	0.773057
			0.756676	0.982633	0.740905	0.683577
			0.604674	1.75378	0.679334	0.586334
			0.584513	0.976289	0.721038	0.605924
