# Supplementary material for: Iron derived from autophagy-mediated ferritin degradation induces cardiomyocyte death and heart failure in mice
Source: eLife. 2021 Feb 2;10:e62174. doi: 10.7554/eLife.62174 (PMC7853718; doi:10.7554/eLife.62174)
Supplement: Figure 4—source data 3. [file elife-62174-fig4-data3.xlsx]

## Sheet: Figure 4—source data 2
	Figure 4—Source Data 3
	Fig. 4 source data 2	Hemoglobin	Sham-Ncoa4+/+	TAC-Ncoa4+/+	Sham-Ncoa4–/–	TAC-Ncoa4–/–		Fig. 4 source data 2	CH	Sham-Ncoa4+/+	TAC-Ncoa4+/+	Sham-Ncoa4–/–	TAC-Ncoa4–/–
			13.8	12.7	13.2	12.7				12.9996	10.6934	11.3916	10.4267
			13	12.9	13.2	13.5				11.271	10.9392	11.5896	11.9475
			14	12.1	13	13.6				13.006	10.0551	11.011	12.444
			13.5	13.3	13.8	11.3				12.123	11.6508	12.2682	8.4863
			13	12.4	13.3	13.3				11.518	10.5896	11.9035	11.8902
			12.9	13.6	13.4	12.7				11.481	12.6208	12.3682	10.7442
	Fig. 4 source data 2	PCV	Sham-Ncoa4+/+	TAC-Ncoa4+/+	Sham-Ncoa4–/–	TAC-Ncoa4–/–		Fig. 4 source data 2	Reticulocytes	Sham-Ncoa4+/+	TAC-Ncoa4+/+	Sham-Ncoa4–/–	TAC-Ncoa4–/–
			44.2	42.3	42.1	39.6				280	280	320	290
			46	41.9	45.1	46.2				280	290	320	440
			45.9	38.9	42.2	42.4				290	290	290	300
			44.4	43	44.3	39.2				330	230	330	270
			38.4	39	40	42.1				300	220	310	300
			40	45.9	40	38.6				340	380	400	270
	Fig. 4 source data 2	MCV	Sham-Ncoa4+/+	TAC-Ncoa4+/+	Sham-Ncoa4–/–	TAC-Ncoa4–/–		Fig. 4 source data 2	Red cell count	Sham-Ncoa4+/+	TAC-Ncoa4+/+	Sham-Ncoa4–/–	TAC-Ncoa4–/–
			46.9	50.2	48.8	48.2				9.42	8.42	8.63	8.21
			53.1	49.4	51.4	52.2				8.67	8.48	8.78	8.85
			49.4	46.8	49.8	46.3				9.29	8.31	8.47	9.15
			49.4	49.1	49.8	52.2				8.98	8.76	8.89	7.51
			43.3	45.7	44.2	47.1				8.86	8.54	8.95	8.94
			44.2	49.5	43.2	45.6				8.9	9.28	9.23	8.46
	Fig. 4 source data 2	MCH	Sham-Ncoa4+/+	TAC-Ncoa4+/+	Sham-Ncoa4–/–	TAC-Ncoa4–/–		Fig. 4 source data 2	Serum ferritin	Sham-Ncoa4+/+	TAC-Ncoa4+/+	Sham-Ncoa4–/–	TAC-Ncoa4–/–
			14.6	15.1	15.3	15.5				69.3022	41.8152	160.257	53.1458
			15	15.2	15	15.3				86.7666	71.2798	143.928	79.6052
			15.1	14.6	15.3	14.9				99.6179	41.5741	99.6179	75.8838
			15	15.2	15.5	15				80.6794	53.4801	71.0085	61.0934
			14.7	14.5	14.9	14.9				85.4119	48.1685	64.9813	23.3063
			14.5	14.7	14.5	15				116.334	66.4687	73.9297	87.6111
										90.4172	34.8028	74.6704	61.1791
	Fig. 4 source data 2		Sham-Ncoa4+/+	TAC-Ncoa4+/+	Sham-Ncoa4–/–	TAC-Ncoa4–/–				61.608	44.2408	162.262	61.6939
		MCHC	31.2	30	31.4	32.1
			28.3	30.8	29.3	29.2		Fig. 4 source data 2	Serum iron	Sham-Ncoa4+/+	TAC-Ncoa4+/+	Sham-Ncoa4–/–	TAC-Ncoa4–/–
			30.5	31.1	30.8	32.1				141.494	175.519	146.473	198.34
			30.4	30.9	31.2	28.8				134.025	93.7759	123.237	223.651
			33.9	31.8	33.6	31.6				147.303	128.216	134.44	190.457
			32.8	29.6	33.6	32.9				140.664	107.469	186.307	183.817
										159.336	119.917	198.34	178.008
										117.012	145.643	175.934	87.1369
										145.228	131.535	125.726	143.569
										118.257	129.875	114.938	89.6266
								Fig. 4 source data 2	Transferrin saturation	Sham-Ncoa4+/+	TAC-Ncoa4+/+	Sham-Ncoa4–/–	TAC-Ncoa4–/–
										52.9851	47.6344	46.341	51.0912
										48.5043	34.2859	42.274	56.7447
										49.6568	43.6324	45.2667	50.9028
										54.5538	34.5567	52.2173	52.4687
										58.9371	35.2053	54.8908	45.8098
										45.1257	43.6386	51.0461	30.6763
										48.7914	40.9253	38.8087	39.9927
										43.9752	46.7358	35.1199	26.6141
