# Supplementary material for: Iron derived from autophagy-mediated ferritin degradation induces cardiomyocyte death and heart failure in mice
Source: eLife. 2021 Feb 2;10:e62174. doi: 10.7554/eLife.62174 (PMC7853718; doi:10.7554/eLife.62174)
Supplement: Figure 5—figure supplement 1—source data 1. [file elife-62174-fig5-figsupp1-data1.xlsx]

## Sheet: Figure 5—figure supplement 1
	Figure 5—figure supplement 1—Source Data 1
	Figure 5—figure supplement 1—data table 1
	Fig. 5 sup 1A	Cell death		Ncoa4+/+						Ncoa4–/–
			Iso	0	10	100	0	10	100	0	10	100	0	10	100
			Fer-1	-	-	-	+	+	+	-	-	-	+	+	+
				12.963	23.1707	47.973	13.9535	15.0685	20	13.1579	16.6667	26.9231	9.32643	10.1266	15.122
				13.6364	32.1429	41.4634	19.0476	24.1379	31.7073	4	16.6667	35.2941	11.1111	13.0435	23.8095
				15.1899	23.6486	35.8025	21.4286	20.6349	28.2051	3.59281	9.50226	14.0187	6.84211	12.6761	14.6853
				4.87805	28.7671	55.5556	2.63158	12.5	18.1818	0	17.2414	23.0769	0	14.2857	16.2162
				11.3636	26.2712	37.2449	7.14286	18.9474	22.1239	6.71141	15.2542	19.3694	11.5385	9.94764	12.1094
	Fig. 5 sup 1B	Cellular ROS		Ncoa4+/+						Ncoa4–/–
			Iso	0	10	100	0	10	100	0	10	100	0	10	100
			Fer-1	-	-	-	+	+	+	-	-	-	+	+	+
				1	1.32993	1.23409	0.945815	0.943776	0.914969	1.00584	1.01415	1.03059	0.991288	1.0324	0.995652
				1	1.46229	1.86512	1.02989	0.920354	1.28589	1.00294	1.15429	1.28065	1.00929	1.02384	1.01753
				1	1.44783	1.80245	0.977441	1.0501	1.06486	0.982205	0.97656	0.970315	1.05147	1.05443	1.02828
				1	1.27474	1.51063	1.1203	1.07236	1.12531	1.09877	1.14053	1.12653	1.10489	1.12957	1.12374
				1	1.18978	1.44987	0.971665	0.944885	0.987142	1.00186	1.01701	1.00006	1.04445	1.05786	0.975454
	Fig. 5 sup 1C	Lipid ROS		Ncoa4+/+						Ncoa4–/–
			Iso	0	10	100	0	10	100	0	10	100	0	10	100
			Fer-1	-	-	-	+	+	+	-	-	-	+	+	+
				1	1.19392	1.39675	0.976134	0.895333	0.941875	0.977715	1.06182	1.01546	0.750438	0.755847	0.78595
				1	1.29977	1.97049	0.936607	1.18449	1.29663	0.984643	1.13222	1.19251	1.03579	1.07891	0.940288
				1	1.36644	1.59159	1.0736	1.12623	1.2522	1.07757	1.11559	1.0575	1.06529	1.12776	0.997455
				1	1.19863	1.45384	1.0173	1.17667	1.02394	1.0955	0.99749	1.11222	0.948728	1.00163	1.14853
				1	1.24432	1.51628	0.976316	1.08739	1.02231	0.867302	0.946959	1.08731	0.892199	0.849368	0.949253
	Fig. 5 sup 1D	Labile iron		Ncoa4+/+						Ncoa4–/–
			Iso	0	10	100	0	10	100	0	10	100	0	10	100
			Fer-1	-	-	-	+	+	+	-	-	-	+	+	+
				1	1.09117	1.06947	1.08213	1.08502	1.22512	0.992764	1.12735	1.2576	0.962319	0.989372	0.997101
				1	1.32826	2.35279	1.00423	1.1159	1.36041	0.602369	0.518613	0.827411	0.463621	0.503384	0.717428
				1	1.51272	1.8816	1.02153	1.03816	1.24462	0.844423	1.07926	1.18493	1.00587	0.895303	0.989237
				1	1.48683	1.57658	1	0.999512	0.995122	0.874634	1.01659	1.0039	1.00537	0.984878	1.02829
				1	1.30246	2.0601	1.0266	1.21773	1.52709	1.06897	1.01872	1.02562	0.994089	1.07783	1.04631
