# Supplementary material for: Iron derived from autophagy-mediated ferritin degradation induces cardiomyocyte death and heart failure in mice
Source: eLife. 2021 Feb 2;10:e62174. doi: 10.7554/eLife.62174 (PMC7853718; doi:10.7554/eLife.62174)
Supplement: Figure 5—figure supplement 2—source data 1. [file elife-62174-fig5-figsupp2-data1.xlsx]

## Sheet: Figure 5—figure supplement 2
	Figure 5—figure supplement 2—Source Data 1
	Figure 5—figure supplement 2—data table 1
	Fig. 5 sup 2	Cell death		Ncoa4+/+						Ncoa4–/–
			RSL3	0	2	5	0	2	5	0	2	5	0	2	5
			Fer-1	-	-	-	+	+	+	-	-	-	+	+	+
				14.0449	30.5195	59.4203	15.873	16.4062	23.3333	13.9535	10.2941	16.6667	14.2857	14.2857	17.5439
				24.8227	38.8601	48.227	19.2982	23.0769	24.4444	0	9.375	8.33333	5.55556	13.6364	4
				14.7059	39.2857	73.5294	21.2121	22.449	35.2941	6.45161	9.375	3.7037	9.7561	8.33333	7.14286
				1.51515	30.1887	62.069	17.6471	21.0526	22.2222	8.57143	2.43902	10.5263	11.7647	12.5	9.09091
				8.57143	32.2581	48.366	5.71429	4.10959	10.9489	8.33333	16.092	13.6364	7.89474	8.77193	6.52174
