# Supplementary material for: Iron derived from autophagy-mediated ferritin degradation induces cardiomyocyte death and heart failure in mice
Source: eLife. 2021 Feb 2;10:e62174. doi: 10.7554/eLife.62174 (PMC7853718; doi:10.7554/eLife.62174)
Supplement: Figure 5—source data 1. [file elife-62174-fig5-data1.xlsx]

## Sheet: Figure 5
	Figure 5—Source Data 1
	Figure 5—data table 1
	Fig. 5A	Cell death		Ncoa4+/+						Ncoa4–/–
			Iso	0	10	100	0	10	100	0	10	100	0	10	100
			Fer-1	-	-	-	+	+	+	-	-	-	+	+	+
				12.069	27.451	38.4615	10.2041	15.9722	19.1257	5.71429	20.5882	18.9189	9.09091	14.6497	17.8862
				10	36.3636	46.5116	20.8333	26.4706	35.7143	15.3846	15.625	21.6216	9.09091	23.5294	33.3333
				12.1212	35.4545	48.6033	10.6667	19.6429	21.1268	7.78443	8.5	13.198	8.33333	15.7233	13.7755
				4.16667	29.2308	48.3516	0	4.16667	25	2.27273	13.3333	26.3158	3.44828	7.69231	18.6046
				12.3288	24.2718	38.4615	13.1579	15.1515	24	5.4878	16.092	12.782	9.15033	10.8527	15.3061
	Fig. 5B	Cellular ROS		Ncoa4+/+						Ncoa4–/–
			Iso	0	10	100	0	10	100	0	10	100	0	10	100
			Fer-1	-	-	-	+	+	+	-	-	-	+	+	+
				1	1.4809	2.05107	0.972294	1.3314	1.48508	0.973258	0.970547	0.998197	0.991989	1.00575	1.01518
				1	1.57344	2.27608	0.999149	1.22398	1.35049	0.988496	1.26009	1.44138	0.98338	1.08213	1.03027
				1	1.40728	1.51187	0.985145	1.06458	1.03614	0.938535	0.951098	0.928276	1.03835	1.03012	1.03959
				1	1.40768	1.5212	0.971392	0.930101	0.969564	0.960943	1.01058	0.950572	0.951547	0.974642	0.965409
				1	1.81673	1.90097	0.977594	0.974439	0.921705	1.10951	1.26639	1.23621	0.987852	1.02174	0.983983
	Fig. 5C	Lipid ROS		Ncoa4+/+						Ncoa4–/–
			Iso	0	10	100	0	10	100	0	10	100	0	10	100
			Fer-1	-	-	-	+	+	+	-	-	-	+	+	+
				1	1.12471	1.48545	0.974152	1.08034	1.22477	1.00238	1.03127	1.10241	1.02633	0.983891	1.00723
				1	1.39614	1.69452	1.1736	1.19827	1.21573	1.05995	1.20477	1.277	1.05403	1.01853	1.13747
				1	1.21823	1.47124	1.04029	1.15024	1.28056	1.03405	1.17308	1.13976	1.06016	1.07836	1.10942
				1	1.14736	1.30935	0.892643	0.989806	0.867455	1.02015	1.10954	1.152	0.983763	0.900389	0.855695
				1	1.25637	1.55616	1.06386	1.07994	1.25605	1.11196	1.12633	1.20655	1.06332	1.03749	1.16979
	Fig. 5D	Labile iron		Ncoa4+/+						Ncoa4–/–
			Iso	0	10	100	0	10	100	0	10	100	0	10	100
			Fer-1	-	-	-	+	+	+	-	-	-	+	+	+
				1	1.56897	2.42586	1.0118	1.18584	1.17994	0.882759	1.17586	1.28965	0.976401	1.07965	1.11799
				1	1.38168	2.70992	0.982188	1.04835	1.4631	0.763359	0.891858	1.06361	0.820611	0.987277	0.977099
				1	1.92627	2.80492	0.960061	1.39478	1.63441	1.04301	1.149	1.27343	0.90937	0.930876	1.19355
				1	1.27852	1.4557	0.733617	1.05461	1.26638	1.10194	1.14502	1.19964	1.08981	1.09284	0.921723
				1	1.19197	1.52302	1.01959	1.02449	1.37316	1.05974	1.12145	1.2145	1.02938	0.995103	1
	Fig. 5E	FTH1/GAPDH		Ncoa4+/+			Ncoa4–/–
			Iso	0	10	100	0	10	100
				1	0.783249	0.693571	1.27564	1.3168	1.36824
				1	0.595744	0.432555	1.43102	1.28994	1.13312
				1	0.880023	0.499151	1.37015	1.21449	1.43591
				1	0.634389	0.582435	0.980421	1.44047	1.21679
				1	0.734925	0.634198	1.46614	1.38799	1.07285
