# Supplementary material for: Iron derived from autophagy-mediated ferritin degradation induces cardiomyocyte death and heart failure in mice
Source: eLife. 2021 Feb 2;10:e62174. doi: 10.7554/eLife.62174 (PMC7853718; doi:10.7554/eLife.62174)
Supplement: Figure 6—figure supplement 1—source data 1. [file elife-62174-fig6-figsupp1-data1.xlsx]

## Sheet: Figure 6—figure supplement 1
	Figure 6—figure supplement 1—Source Data 1
	Figure 6—figure supplement 1—data table 1
	Fig. 6 sup 1A	Nppa/Gapdh	Sham-saline	TAC-saline	Sham-Fer-1	TAC-Fer-1		Fig. 6 sup 1A	Col1a2/Gapdh	Sham-saline	TAC-saline	Sham-Fer-1	TAC-Fer-1
			1.11635	6.98349	0.815023	1.93128				0.624677	4.81048	0.525339	1.83856
			0.588187	6.60437	0.481525	0.911344				0.56686	2.04411	0.352211	1.16276
			0.556855	5.12302	1.24678	2.55451				0.626865	1.84213	0.965003	2.1405
			0.531337	3.31582	0.9984	0.767475				1.21089	2.80408	0.425815	1.05011
			0.72868	30.0579	0.932392	6.08044				0.532486	4.15638	1.00617	1.65539
			1.60192	22.3999	0.893472	3.76633				1.24016	2.60408	0.606415	2.19585
			1.85108	7.20196	1.19386	1.04952				1.95774	2.62643	0.561138	1.20244
			1.0256	10.7345	0.824671	4.34551				1.24031	3.5845	0.71267	1.67187
	Fig. 6 sup 1A	Nppb/Gapdh	Sham-saline	TAC-saline	Sham-Fer-1	TAC-Fer-1		Fig. 6 sup 1A	Col3a1/Gapdh	Sham-saline	TAC-saline	Sham-Fer-1	TAC-Fer-1
			1.12645	7.05443	0.359626	2.01053				0.610921	6.99503	0.448083	2.1987
			0.866683	3.32414	0.862884	1.45713				0.552913	1.69613	0.363555	1.00227
			0.912247	1.73774	1.17882	1.74843				0.607991	1.567	1.01906	2.77462
			1.41836	1.4817	0.645343	1.49992				1.50867	2.74263	0.334787	0.855545
			1.84436	5.40264	1.97304	4.13244				0.450259	3.73548	1.48627	1.54979
			0.818277	8.60693	0.1943	7.40961				1.06551	2.54263	0.701388	3.01364
			0.566337	9.52602	0.86789	2.77988				1.84362	4.40604	0.489238	1.21532
			0.447282	6.43407	0.610374	1.28057				1.36013	3.48885	0.61382	1.73185
	Fig. 6 sup 1A	Myh7/Gapdh	Sham-saline	TAC-saline	Sham-Fer-1	TAC-Fer-1		Fig. 6 sup 1B	4-HNE	Sham-saline	TAC-saline	Sham-Fer-1	TAC-Fer-1
			0.444062	6.07013	0.599001	3.00978				2.1995	4.65777	0.803035	4.00921
			0.663137	3.18549	0.368737	1.09594				1.97121	11.6722	2.23538	3.28128
			0.462364	1.70025	1.2007	1.8894				2.3402	4.85949	1.30243	3.45057
			1.34191	1.08732	0.738285	1.80127				3.04335	5.47665	1.81198	2.73151
			0.592395	7.55994	1.0474	1.89072				1.12054	9.36348	2.6941	4.32577
			1.73045	6.05805	0.596084	3.95477
			1.91059	6.84873	1.07988	1.1166
			0.855092	5.16154	1.45289	2.0824
