# Supplementary material for: Iron derived from autophagy-mediated ferritin degradation induces cardiomyocyte death and heart failure in mice
Source: eLife. 2021 Feb 2;10:e62174. doi: 10.7554/eLife.62174 (PMC7853718; doi:10.7554/eLife.62174)
Supplement: Figure 6—figure supplement 2—source data 1. [file elife-62174-fig6-figsupp2-data1.xlsx]

## Sheet: Figure 6—figure supplement 2
	Figure 6—figure supplement 2—Source Data 1
	Figure 6—figure supplement 2—data table 1
	Fig. 6 sup 2A	LVIDd	TAC-Saline	TAC-Fer-1		Fig. 6 sup 2A	IVSd	TAC-Saline	TAC-Fer-1		Fig. 6 sup 2B	LV/Tibia	TAC-Saline	TAC-Fer-1
			3.5088	3.61574				0.875926	0.886111				7.22472	7.18889
			3.48333	3.47824				0.906481	0.84537				7.39665	7.23034
			3.27454	3.40694				0.896296	0.860648				6.82759	7.23864
			3.49352	3.20324				0.931944	0.931944				7.40223	7.50867
			3.21852	3.41204				0.860648	0.926852				7.10405	7.62011
	Fig. 6 sup 2A	LVIDs	TAC-Saline	TAC-Fer-1		Fig. 6 sup 2A	LVWPd	TAC-Saline	TAC-Fer-1		Fig. 6 sup 2B	LV/Tibia	TAC-Saline	TAC-Fer-1
			1.89444	1.90972				0.865741	0.855556				8.55618	9.48333
			1.88935	1.87917				0.896296	0.901389				9.14525	8.56742
			1.68056	1.84352				0.906481	0.855556				8.74138	7.98295
			1.94537	1.75185				0.875926	0.94213				9.30168	7.86127
			1.69583	1.81806				0.860648	0.865741				8.54913	9.26257
	Fig. 6 sup 2A	FS	TAC-Saline	TAC-Fer-1		Fig. 6 sup 2A	LV mass	TAC-Saline	TAC-Fer-1
			46.0087	47.1831				85.5393	89.7128
			45.7602	45.9736				88.8262	84.7163
			48.6781	45.8894				80.6827	79.9607
			44.3149	45.31				89.595	82.573
			47.3101	46.7164				73.4573	85.3023
