# Supplementary material for: Iron derived from autophagy-mediated ferritin degradation induces cardiomyocyte death and heart failure in mice
Source: eLife. 2021 Feb 2;10:e62174. doi: 10.7554/eLife.62174 (PMC7853718; doi:10.7554/eLife.62174)
Supplement: Figure 6—source data 1. [file elife-62174-fig6-data1.xlsx]

## Sheet: Figure 6
	Figure 6—Source Data 1
	Figure 6—data table 1
	Fig. 6B	LVIDd	Sham-saline	TAC-saline	Sham-Fer-1	TAC-Fer-1		Fig. 6B	LVPWd	Sham-saline	TAC-saline	Sham-Fer-1	TAC-Fer-1		Fig. 6D	Fibrotic fraction	Sham-saline	TAC-saline	Sham-Fer-1	TAC-Fer-1
			3.26435	3.96204	3.34583	3.68194				0.712963	0.937037	0.748611	0.850463				2.5857	6.36396	1.19091	2.5156
			3.15232	3.93657	3.42222	3.53426				0.784259	0.998148	0.763889	0.896296				2.12366	6.01957	1.48218	3.61223
			3.33056	3.70741	3.42732	3.70741				0.743519	0.993056	0.733333	0.830093				2.10046	3.5837	1.75921	2.50121
			3.45278	4.09954	3.26944	3.51898				0.743519	1.0287	0.738426	0.870833				1.47203	6.75433	1.80382	2.12499
			3.37639	4.56296	3.06065	3.52407				0.748611	1.0338	0.768981	0.840278				2.43899	13.8005	1.4013	1.26494
			3.06574	3.78889	3.08611	3.51389				0.728241	0.957407	0.723148	0.850463
			3.18287	4.10972	3.17778	3.42222				0.753704	0.952315	0.738426	0.870833		Fig. 6D	Cardiomyocyte area	Sham-saline	TAC-saline	Sham-Fer-1	TAC-Fer-1
			2.96389	4.17083	3.08611	3.65648				0.718056	0.926852	0.743519	0.870833				279.342	664.535	297.163	462.403
			3.24907	5.21481	3.22361	3.9213				0.758796	1.11528	0.738426	0.921759				334.228	669.735	274.32	350.3
			3.12685	4.70556	3.30509	3.88565				0.743519	1.0287	0.768981	0.926852				299.587	801.728	324.627	456.151
																	248.465	671.25	391.917	563.864
	Fig. 6B	LVIDs	Sham-saline	TAC-saline	Sham-Fer-1	TAC-Fer-1		Fig. 6B	LV mass	Sham-saline	TAC-saline	Sham-Fer-1	TAC-Fer-1				269.869	585.434	275.707	478.276
			1.67037	3.17778	1.67037	2.15417				59.9008	115.937	64.4421	90.4628
			1.51759	2.8875	1.78241	2.03704				62.5278	122.724	71.2738	89.0485		Fig. 6E	MDA	Sham-saline	TAC-saline	Sham-Fer-1	TAC-Fer-1
			1.76204	2.57685	1.73148	1.93009				63.0688	108.004	66.0668	89.9598				0.600648	0.88343	0.677242	0.709426
			1.77222	3.48333	1.62963	2.11343				66.2407	133.736	61.7951	83.8077				0.764276	1.03191	0.619537	0.683791
			1.66528	3.75833	1.54815	1.86898				64.7849	158.252	56.9555	82.5951				0.649403	0.909033	0.598105	0.594282
			1.38519	2.58704	1.47685	2.04722				54.4258	106.341	52.6212	81.867				0.751865	0.993845	0.612598	0.798979
			1.62963	3.28981	1.65	1.93518				59.191	125.727	58.4783	83.6126				0.649027	0.932339	0.611589	0.649959
			1.53796	3.21852	1.5838	2.08796				51.8375	125.425	55.5393	95.8806
			1.5838	4.675	1.57361	2.45972				62.3419	214.835	60.4094	113.176		Fig. 6F	Ptgs2/Gapdh	Sham-saline	TAC-saline	Sham-Fer-1	TAC-Fer-1
			1.53287	3.76852	1.63982	2.61759				57.8117	178.136	63.4787	109.839				1.01002	8.46495	0.659384	1.6681
																	1.44207	7.92567	0.72626	1.15447
	Fig. 6B	FS	Sham-saline	TAC-saline	Sham-Fer-1	TAC-Fer-1		Fig. 6C	LV/Tibia	Sham-saline	TAC-saline	Sham-Fer-1	TAC-Fer-1				0.600531	7.68861	0.748098	3.69327
			48.83	19.7943	50.0761	41.4938				5.74118	7.64118	5.5	5.67879				0.154894	8.86495	0.236847	2.19285
			51.8578	26.6494	47.9167	42.3631				5.15663	8.62941	5.84	7.36471				1.57936	15.4818	0.909798	11.7864
			47.0948	30.4945	49.48	47.9395				6.40805	8.13174	5.82941	6.01734				1.75106	15.0233	0.201845	7.26273
			48.6726	15.0311	50.1557	39.9421				6.08092	9.69186	5.34884	6.46471				0.68897	11.3357	0.640804	3.44676
			50.6787	17.6339	49.4176	46.9653				5.98266	10.1059	5.57803	5.54706				0.773086	4.72265	0.322653	1.57664
			54.8173	31.7204	52.1452	41.7391				5.04094	8.05952	5.81871	7.53216
			48.8	19.9504	48.0769	43.4524				5.38286	9.0814	5.95429	7.26901
			48.11	22.8327	48.6799	42.8969				6.03488	7.95238	5.69006	7.21387
			51.2539	10.3516	51.1848	37.2727				5.5814	11.5848	5.78857	9.66474
			50.9772	19.9134	50.3852	32.6343				5.89595	9.10345	5.56897	9.55747
	Fig. 6B	IVSd	Sham-saline	TAC-saline	Sham-Fer-1	TAC-Fer-1		Fig. 6C	Lung/Tibia	Sham-saline	TAC-saline	Sham-Fer-1	TAC-Fer-1
			0.753704	0.947222	0.753704	0.865741				9.02353	8.55882	8.24713	7.82424
			0.789352	0.977778	0.809722	0.881019				8.28313	8.49412	9.45143	8.74706
			0.743519	0.937037	0.753704	0.865741				8.54598	8.76048	8.74118	8.47977
			0.733333	0.977778	0.758796	0.840278				8.67052	8.12791	8.40698	9.07059
			0.743519	0.967593	0.753704	0.850463				8.98844	8.77059	9.3526	8.27059
			0.743519	0.906481	0.702778	0.835185				8.59064	9.2619	8.84211	8.90058
			0.743519	0.9625	0.748611	0.891204				8.78286	9.29651	8.28571	8.46199
			0.758796	0.952315	0.738426	0.931944				8.21512	8.69048	7.9883	9.58382
			0.758796	1.01852	0.758796	0.952315				8.06977	16.6667	7.79429	9.83815
			0.758796	1.07454	0.738426	0.926852				8.48555	9.75862	8.17241	9.7931
